# Supplementary material
Source: publisher site journal article supplement (https://www.dovepress.com/article/454721)
Supplement: Supplementary file 1 [file Supplementary%20materials.pdf]

## Supplemental materials

**Table S1. Mean change in individual OSD symptoms in the open-label population.**

|                          | PF-LAT E / PF-LAT E<br>(N=70) | P-LAT / PF-LAT E<br>(N=66) |
|--------------------------|-------------------------------|----------------------------|
| Burning/stinging/itching |                               |                            |
| Week 12                  | -0.17                         | 0.02                       |
| Month 6                  | -0.25                         | -0.15                      |
| Month 9                  | -0.23                         | -0.11                      |
| Month 15                 | -0.25                         | -0.21                      |
| Blurred/poor vision      |                               |                            |
| Week 12                  | -0.11                         | -0.06                      |
| Month 6                  | -0.14                         | -0.06                      |
| Month 9                  | -0.17                         | -0.03                      |
| Month 15                 | -0.18                         | -0.08                      |
| Dry eye                  |                               |                            |
| Week 12                  | -0.14                         | -0.11                      |
| Month 6                  | -0.09                         | -0.20                      |
| Month 9                  | -0.19                         | -0.14                      |
| Month 15                 | -0.31                         | -0.21                      |

### Notes:

All patients were treated with preservative-free latanoprost (0.005%) eye drop emulsion during the open-label extension period (Week 12 through Month 15).

Treatment groups:

PF-LAT E / PF-LAT E: received preservative-free latanoprost (0.005%) eye drop emulsion during both the randomized (baseline through Week 12) and open-label (Week 12 through Month 15) study periods.

P-LAT / PF-LAT E: received preserved latanoprost (0.005%) during the randomized period (baseline through Week 12) and preservative-free latanoprost (0.005%) eye drop emulsion during the open-label extension period (Week 12 through Month 15).

**Abbreviations:** OSD, ocular surface disease; PF-LAT E, preservative-free latanoprost eye drop emulsion; P-LAT, preserved latanoprost.

**Figure S1. CFS score in the open-label population**

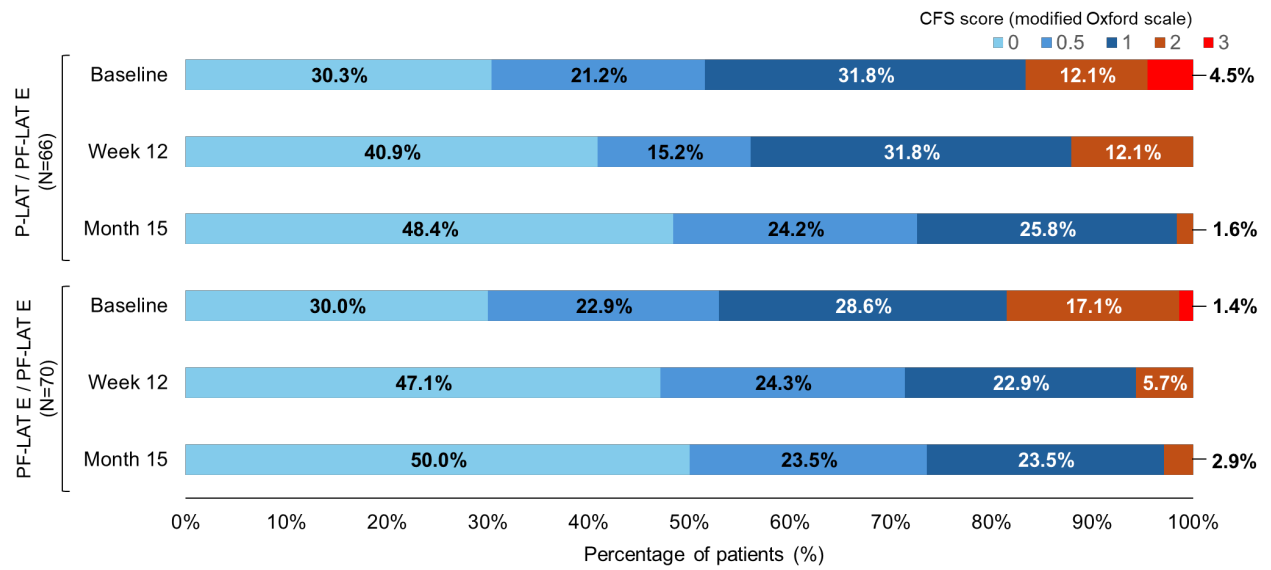

**Notes:**

All patients were treated with preservative-free latanoprost 0.005% eye drop emulsion during the open-label extension period (Week 12 through Month 15).

Treatment groups:

PF-LAT E / PF-LAT E: received preservative-free latanoprost 0.005% eye drop emulsion during both the randomized (baseline through Week 12) and open-label (Week 12 through Month 15) study periods.

P-LAT / PF-LAT E: received preserved latanoprost 0.005% during the randomized period (baseline through Week 12) and preservative-free latanoprost 0.005% eye drop emulsion during the open-label extension period (Week 12 through Month 15).

**Abbreviations:** CFS, corneal fluorescein staining; PF-LAT E, preservative-free latanoprost eye drop emulsion; P-LAT, preserved latanoprost.
